# Supplementary material for: Lidocaine–Liposomes—A Promising Frontier for Transdermal Pain Management
Source: MDPI journal article supplement (doi:10.3390/jcm13010271), 2024-01-03
Supplement: s1 [file s1]

**Table S1.** Paw withdrawal threshold after lidocaine 2.5 % administration

|                    | Time after $\lambda$ -C delivery (minutes) | L (n=10) |                 | Control group (n=10) |                 | EMLA Group (n=10) |                 | P Value      |              |
|--------------------|--------------------------------------------|----------|-----------------|----------------------|-----------------|-------------------|-----------------|--------------|--------------|
|                    |                                            | Mean     | 95% CI          | Mean                 | 95 % CI         | Mean              | 95 % CI         | L vs Control | L vs EMLA    |
| <b>Cold plate</b>  | 0                                          | 15.333   | (4.991-25.675)  | 7.666                | (-2.675-18.009) | 3.333             | (1.899-4.767)   | 0.976        | 0.512        |
|                    | 30                                         | 9.000    | (-7.289-25.289) | 8.333                | (3.162-13.504)  | 4.666             | (-5.675-15.009) | 0.761        | 0.403        |
|                    | 60                                         | 2.333    | (-0.535-5.201)  | 6.333                | (-0.837-13.504) | 2.333             | (-3.403-8.070)  | 0.667        | 0.667        |
|                    | 120                                        | 1.000    | (-1.484-3.484)  | 5.666                | (-2.318-13.652) | 3.000             | (-5.956-11.956) | 0.901        | 0.821        |
|                    | 180                                        | 1.000    | (-1.484-3.484)  | 5.000                | (0.697-9.302)   | 2.666             | (-4.922-10.255) | 0.333        | 0.546        |
|                    | 240                                        | 0.333    | (-1.100-1.767)  | 1.666                | (-1.201-4.535)  | 2.000             | (-0.484-4.484)  | <b>0.000</b> | 0.333        |
| <b>Hot plate</b>   | 0                                          | 4.900    | (4.242-5.557)   | 4.133                | (1.477-6.789)   | 7.033             | (4.377-9.689)   | 0.575        | 0.758        |
|                    | 30                                         | 3.600    | (2.854-4.345)   | 3.733                | (-1.371-8.838)  | 2.533             | (2.389-2.676)   | 0.953        | 0.333        |
|                    | 60                                         | 4.433    | (1.239-7.627)   | 5.133                | (2.620-7.646)   | 5.633             | (1.257-10.009)  | 0.536        | 0.748        |
|                    | 120                                        | 4.966    | (2.219-7.714)   | 2.933                | (0.625-5.241)   | 4.233             | (0.496-7.970)   | 0.198        | 0.782        |
|                    | 180                                        | 4.600    | (2.861-6.338)   | 3.533                | (2.307-4.758)   | 2.766             | (2.049-3.483)   | <b>0.027</b> | 0.758        |
|                    | 240                                        | 3.866    | (2.498-5.234)   | 3.066                | (2.779-3.353)   | 2.833             | (2.116-3.550)   | 0.300        | 0.967        |
| <b>Algesimeter</b> | 0                                          | 6.500    | (2.021-10.978)  | 10.666               | (-0.874-22.207) | 16.166            | (2.88-29.447)   | 0.110        | 0.391        |
|                    | 30                                         | 4.333    | (3.616-5.050)   | 12.666               | (0.412-24.920)  | 17.000            | (-0.210-34.210) | 0.731        | <b>0.000</b> |
|                    | 60                                         | 6.166    | (1.464-10.869)  | 14.833               | (-7.707-37.373) | 18.000            | (-2.894-38.894) | 0.645        | 0.716        |
|                    | 120                                        | 4.333    | (2.436-6.230)   | 3.666                | (-1.353-8.686)  | 16.500            | (-1.542-34.542) | 0.212        | 0.750        |
|                    | 180                                        | 5.166    | (2.581-7.752)   | 8.400                | (2.55-14.241)   | 9.500             | (3.808-15.191)  | 0.869        | 0.367        |
|                    | 240                                        | 6.333    | (-3.782-16.449) | 9.033                | (1.41-16.650)   | 14.833            | (-7.707-37.373) | 0.547        | <b>0.027</b> |

$\lambda$ -C:  $\lambda$ -carrageenan; L: Lidocaine 2.5 %; EMLA: Eutectic Mixture of Local Anesthetics; CI: confidence interval

**Table S2.** Paw withdrawal threshold after lidocaine-cyclodextrin 2.5% administration

|                    | Time after $\lambda$ -C delivery (minutes) | L-CD (n=10) |                  | Control group (n=10) |                 | EMLA Group (n=10) |                 | P Value         |              |
|--------------------|--------------------------------------------|-------------|------------------|----------------------|-----------------|-------------------|-----------------|-----------------|--------------|
|                    |                                            | Mean        | 95% CI           | Mean                 | 95 % CI         | Mean              | 95 % CI         | L-CD vs Control | L-CD vs EMLA |
| <b>Cold plate</b>  | 0                                          | 12.033      | (11.889-12.176)  | 7.666                | (-2.675-18.009) | 3.333             | (1.899-4.767)   | 0.512           | 0.000        |
|                    | 30                                         | 13.000      | (-9.079-35.079)  | 8.333                | (3.162-13.504)  | 4.666             | (-5.675-15.009) | 0.299           | 0.657        |
|                    | 60                                         | 7.000       | (-10.389-24.389) | 6.333                | (-0.837-13.504) | 2.333             | (-3.403-8.070)  | 0.333           | 0.333        |
|                    | 120                                        | 7.000       | (-2.936-16.936)  | 5.666                | (-2.318-13.652) | 3.000             | (-5.956-11.956) | 0.234           | 0.512        |
|                    | 180                                        | 6.000       | (-4.828-16.828)  | 5.000                | (0.697-9.302)   | 2.666             | (-4.922-10.255) | 0.073           | 0.285        |
|                    | 240                                        | 4.000       | (-5.936-13.936)  | 1.666                | (-1.201-4.535)  | 2.000             | (-0.484-4.484)  | 1               | 0.667        |
| <b>Hot plate</b>   | 0                                          | 4.266       | (2.402-6.131)    | 4.133                | (1.477-6.789)   | 7.033             | (4.377-9.689)   | 0.946           | 0.763        |
|                    | 30                                         | 3.233       | (0.846-5.620)    | 3.733                | (-1.371-8.838)  | 2.533             | (2.389-2.676)   | 0.476           | 0.237        |
|                    | 60                                         | 2.300       | (1.554-3.045)    | 5.133                | (2.620-7.646)   | 5.633             | (1.257-10.009)  | 0.365           | 0.351        |
|                    | 120                                        | 2.300       | (1.217-3.382)    | 2.933                | (0.625-5.241)   | 4.233             | (0.496-7.970)   | 0.662           | 0.358        |
|                    | 180                                        | 2.266       | (1.749-2.783)    | 3.533                | (2.307-4.758)   | 2.766             | (2.049-3.483)   | 0.577           | 0.154        |
|                    | 240                                        | 3.600       | (2.109-5.090)    | 3.066                | (2.779-3.353)   | 2.833             | (2.116-3.550)   | 0.333           | 1            |
| <b>Algesimeter</b> | 0                                          | 13.100      | (-5.823-32.023)  | 10.666               | (-0.874-22.207) | 16.166            | (2.88-29.447)   | 0.888           | 0.831        |
|                    | 30                                         | 8.666       | (-0.488-17.822)  | 12.666               | (0.412-24.920)  | 17.000            | (-0.210-34.210) | 0.862           | 0.130        |
|                    | 60                                         | 6.133       | (3.138-9.128)    | 14.833               | (-7.707-37.373) | 18.000            | (-2.894-38.894) | 0.167           | 0.806        |
|                    | 120                                        | 12.500      | (5.927-19.072)   | 3.666                | (-1.353-8.686)  | 16.500            | (-1.542-34.542) | 0.121           | 0.917        |
|                    | 180                                        | 11.566      | (9.735-13.397)   | 8.400                | (2.55-14.241)   | 9.500             | (3.808-15.191)  | 0.440           | 0.324        |
|                    | 240                                        | 10.666      | (3.388-17.944)   | 9.033                | (1.41-16.650)   | 14.833            | (-7.707-37.373) | 0.068           | 0.452        |

$\lambda$ -C:  $\lambda$ -carrageenan; L-CD: lidocaine-cyclodextrin 2.5%; EMLA: Eutectic Mixture of Local Anesthetics;  
CI: confidence interval

**Table S3.** Paw withdrawal threshold after lidocaine – chitosan 4 % administration

|                    | Time after $\lambda$ -C delivery (minutes) | L-CS (n=10) |                  | Control group (n=10) |                 | EMLA Group (n=10) |                 | P Value         |              |
|--------------------|--------------------------------------------|-------------|------------------|----------------------|-----------------|-------------------|-----------------|-----------------|--------------|
|                    |                                            | Mean        | 95% CI           | Mean                 | 95 % CI         | Mean              | 95 % CI         | L-CS vs Control | L-CS vs EMLA |
| <b>Cold plate</b>  | 0                                          | 12.666      | (-1.889-27.222)  | 7.666                | (-2.675-18.009) | 3.333             | (1.899-4.767)   | 0.403           | 0.109        |
|                    | 30                                         | 13.333      | (3.293-23.372)   | 8.333                | (3.162-13.504)  | 4.666             | (-5.675-15.009) | 0.754           | 0.396        |
|                    | 60                                         | 3.333       | (-1.837-8.504)   | 6.333                | (-0.837-13.504) | 2.333             | (-3.403-8.070)  | 0.821           | 0.821        |
|                    | 120                                        | 1.000       | (-1.484-3.484)   | 5.666                | (-2.318-13.652) | 3.000             | (-5.956-11.956) | 0.901           | 0.821        |
|                    | 180                                        | 3.000       | (-3.572-9.572)   | 5.000                | (0.697-9.302)   | 2.666             | (-4.922-10.255) | 0.121           | 0.091        |
|                    | 240                                        | 2.333       | (-1.461-6.127)   | 1.666                | (-1.201-4.535)  | 2.000             | (-0.484-4.484)  | 0.454           | 0.121        |
| <b>Hot plate</b>   | 0                                          | 3.833       | (3.034-4.631)    | 4.133                | (1.477-6.789)   | 7.033             | (4.377-9.689)   | 0.537           | 0.355        |
|                    | 30                                         | 3.600       | (3.169-4.030)    | 3.733                | (-1.371-8.838)  | 2.533             | (2.389-2.676)   | 0.713           | <b>0.000</b> |
|                    | 60                                         | 3.833       | (3.316-4.350)    | 5.133                | (2.620-7.646)   | 5.633             | (1.257-10.009)  | 0.196           | 0.530        |
|                    | 120                                        | 4.133       | (3.099-5.167)    | 2.933                | (0.625-5.241)   | 4.233             | (0.496-7.970)   | 0.890           | 0.130        |
|                    | 180                                        | 4.200       | (1.219-7.181)    | 3.533                | (2.307-4.758)   | 2.766             | (2.049-3.483)   | 0.398           | 0.333        |
|                    | 240                                        | 4.333       | (0.942-7.724)    | 3.066                | (2.779-3.353)   | 2.833             | (2.116-3.550)   | 0.428           | 0.905        |
| <b>Algesimeter</b> | 0                                          | 13.833      | (-10.261-37.928) | 10.666               | (-0.874-22.207) | 16.166            | (2.88-29.447)   | 0.118           | 0.163        |
|                    | 30                                         | 14.500      | (-1.357-30.357)  | 12.666               | (0.412-24.920)  | 17.000            | (-0.210-34.210) | 0.399           | 0.870        |
|                    | 60                                         | 17.000      | (-7.465-41.465)  | 14.833               | (-7.707-37.373) | 18.000            | (-2.894-38.894) | 0.936           | 0.297        |
|                    | 120                                        | 10.166      | (-11.069-31.403) | 3.666                | (-1.353-8.686)  | 16.500            | (-1.542-34.542) | 0.611           | 0.351        |
|                    | 180                                        | 7.000       | (5.757-8.242)    | 8.400                | (2.55-14.241)   | 9.500             | (3.808-15.191)  | 0.690           | 0.546        |
|                    | 240                                        | 5.333       | (3.436-7.230)    | 9.033                | (1.41-16.650)   | 14.833            | (-7.707-37.373) | 0.837           | 0.318        |

$\lambda$ -C:  $\lambda$ -carrageenan; L-CS: lidocaine – chitosan 4 %; EMLA: Eutectic Mixture of Local Anesthetics; CI: confidence interval

**Table S4.** Paw withdrawal threshold after lidocaine - chitosan hydrochloride administration

|                    | Time after $\lambda$ -C delivery (minutes) | L-CSH (n=10) |                  | Control group (n=10) |                 | EMLA Group (n=10) |                 | P Value          |               |
|--------------------|--------------------------------------------|--------------|------------------|----------------------|-----------------|-------------------|-----------------|------------------|---------------|
|                    |                                            | Mean         | 95% CI           | Mean                 | 95 % CI         | Mean              | 95 % CI         | L-CSH vs Control | L-CSH vs EMLA |
| <b>Cold plate</b>  | 0                                          | 8.000        | (1.427-14.572)   | 7.666                | (-2.675-18.009) | 3.333             | (1.899-4.767)   | 0.700            | 0.788         |
|                    | 30                                         | 7.333        | (1.596-13.070)   | 8.333                | (3.162-13.504)  | 4.666             | (-5.675-15.009) | 0.821            | 0.821         |
|                    | 60                                         | 7.333        | (-8.829-23.496)  | 6.333                | (-0.837-13.504) | 2.333             | (-3.403-8.070)  | 0.305            | 0.305         |
|                    | 120                                        | 6.666        | (-5.072-18.406)  | 5.666                | (-2.318-13.652) | 3.000             | (-5.956-11.956) | 0.235            | <b>0.043</b>  |
|                    | 180                                        | 4.333        | (-10.222-18.889) | 5.000                | (0.697-9.302)   | 2.666             | (-4.922-10.255) | 0.109            | 0.103         |
|                    | 240                                        | 1.333        | (-2.461-5.127)   | 1.666                | (-1.201-4.535)  | 2.000             | (-0.484-4.484)  | 0.879            | 0.788         |
| <b>Hot plate</b>   | 0                                          | 5.066        | (0.804-9.328)    | 4.133                | (1.477-6.789)   | 7.033             | (4.377-9.689)   | 0.277            | 0.460         |
|                    | 30                                         | 4.700        | (2.961-6.438)    | 3.733                | (-1.371-8.838)  | 2.533             | (2.389-2.676)   | 0.622            | 0.091         |
|                    | 60                                         | 8.133        | (-4.308-20.574)  | 5.133                | (2.620-7.646)   | 5.633             | (1.257-10.009)  | 0.570            | 0.146         |
|                    | 120                                        | 4.900        | (0.299-9.500)    | 2.933                | (0.625-5.241)   | 4.233             | (0.496-7.970)   | 0.235            | 0.745         |
|                    | 180                                        | 4.466        | (3.462-5.470)    | 3.533                | (2.307-4.758)   | 2.766             | (2.049-3.483)   | 0.177            | 0.909         |
|                    | 240                                        | 5.033        | (1.134-8.932)    | 3.066                | (2.779-3.353)   | 2.833             | (2.116-3.550)   | 0.523            | 0.810         |
| <b>Algesimeter</b> | 0                                          | 11.166       | (-13.341-35.674) | 10.666               | (-0.874-22.207) | 16.166            | (2.88-29.447)   | 0.663            | 0.944         |
|                    | 30                                         | 8.166        | (1.792-14.540)   | 12.666               | (0.412-24.920)  | 17.000            | (-0.210-34.210) | 0.542            | 0.189         |
|                    | 60                                         | 13.833       | (-4.603-32.270)  | 14.833               | (-7.707-37.373) | 18.000            | (-2.894-38.894) | 0.365            | 0.996         |
|                    | 120                                        | 15.833       | (-4.360-36.027)  | 3.666                | (-1.353-8.686)  | 16.500            | (-1.542-34.542) | 0.805            | 0.233         |
|                    | 180                                        | 11.833       | (-1.21-24.880)   | 8.400                | (2.55-14.241)   | 9.500             | (3.808-15.191)  | 0.661            | 0.104         |
|                    | 240                                        | 15.000       | (0.675-29.324)   | 9.033                | (1.41-16.650)   | 14.833            | (-7.707-37.373) | 0.764            | 0.245         |

$\lambda$ -C:  $\lambda$ -carrageenan; L-CSH: lidocaine - chitosan hydrochloride; EMLA: Eutectic Mixture of Local Anesthetics; CI: confidence interval

**Table S5.** Paw withdrawal threshold after lidocaine-chitosan-liposomes administration

|                    | Time after $\lambda$ -C delivery (minutes) | L-CS-LP (n=10) |                 | Control group (n=10) |                 | EMLA Group (n=10) |                 | P Value            |                 |
|--------------------|--------------------------------------------|----------------|-----------------|----------------------|-----------------|-------------------|-----------------|--------------------|-----------------|
|                    |                                            | Mean           | 95% CI          | Mean                 | 95 % CI         | Mean              | 95 % CI         | L-CS-LP vs Control | L-CS-LP vs EMLA |
| <b>Cold plate</b>  | 0                                          | 14.000         | (11.515-16.484) | 7.666                | (-2.675-18.009) | 3.333             | (1.899-4.767)   | 0.179              | 0.333           |
|                    | 30                                         | 8.666          | (1.077-16.255)  | 8.333                | (3.162-13.504)  | 4.666             | (-5.675-15.009) | 0.300              | 0.058           |
|                    | 60                                         | 6.000          | (-0.572-12.572) | 6.333                | (-0.837-13.504) | 2.333             | (-3.403-8.070)  | 0.788              | 0.788           |
|                    | 120                                        | 2.333          | (-1.461-6.127)  | 5.666                | (-2.318-13.652) | 3.000             | (-5.956-11.956) | 0.780              | 0.942           |
|                    | 180                                        | 2.333          | (-1.461-6.127)  | 5.000                | (0.697-9.302)   | 2.666             | (-4.922-10.255) | 0.879              | 0.667           |
|                    | 240                                        | 1.666          | (0.232-3.100)   | 1.666                | (-1.201-4.535)  | 2.000             | (-0.484-4.484)  | <b>0.000</b>       | 0.333           |
| <b>Hot plate</b>   | 0                                          | 5.766          | (3.758-7.774)   | 4.133                | (1.477-6.789)   | 7.033             | (4.377-9.689)   | 0.272              | 0.454           |
|                    | 30                                         | 5.233          | (-1.003-11.470) | 3.733                | (-1.371-8.838)  | 2.533             | (2.389-2.676)   | 0.988              | 0.275           |
|                    | 60                                         | 4.366          | (4.079-4.653)   | 5.133                | (2.620-7.646)   | 5.633             | (1.257-10.009)  | 0.698              | <b>0.018</b>    |
|                    | 120                                        | 4.633          | (1.429-7.837)   | 2.933                | (0.625-5.241)   | 4.233             | (0.496-7.970)   | 0.910              | 0.109           |
|                    | 180                                        | 4.233          | (2.865-5.601)   | 3.533                | (2.307-4.758)   | 2.766             | (2.049-3.483)   | 0.235              | 0.967           |
|                    | 240                                        | 5.566          | (2.139-8.993)   | 3.066                | (2.779-3.353)   | 2.833             | (2.116-3.550)   | 0.116              | 0.551           |
| <b>Algesimeter</b> | 0                                          | 6.000          | (2.273-9.726)   | 10.666               | (-0.874-22.207) | 16.166            | (2.88-29.447)   | 0.402              | 0.121           |
|                    | 30                                         | 5.500          | (1.021-9.978)   | 12.666               | (0.412-24.920)  | 17.000            | (-0.210-34.210) | 0.244              | 0.488           |
|                    | 60                                         | 4.600          | (-0.386-9.586)  | 14.833               | (-7.707-37.373) | 18.000            | (-2.894-38.894) | 0.693              | 0.054           |
|                    | 120                                        | 8.500          | (5.213-11.786)  | 3.666                | (-1.353-8.686)  | 16.500            | (-1.542-34.542) | 0.121              | 0.917           |
|                    | 180                                        | 7.166          | (1.995-12.337)  | 8.400                | (2.55-14.241)   | 9.500             | (3.808-15.191)  | 0.569              | 0.667           |
|                    | 240                                        | 7.166          | (1.995-12.337)  | 9.033                | (1.41-16.650)   | 14.833            | (-7.707-37.373) | 0.863              | 0.618           |

$\lambda$ -C:  $\lambda$ -carrageenan; L-CS-LP: lidocaine-chitosan-liposomes; EMLA: Eutectic Mixture of Local Anesthetics; CI: confidence interval

**Table S6.** Statistical indicators for the researched substances

| Time<br>(min.)                            | Cold Plate |      |      |      |      |      | Hot Plate |      |      |      |      |      |
|-------------------------------------------|------------|------|------|------|------|------|-----------|------|------|------|------|------|
|                                           | 0          | 30   | 60   | 120  | 180  | 240  | 0         | 30   | 60   | 120  | 180  | 240  |
| <b>Lidocaine - Chitosan Hydrochloride</b> |            |      |      |      |      |      |           |      |      |      |      |      |
| <i>Min</i>                                | 6.0        | 6.0  | 1.0  | 3.0  | 0.0  | 0.0  | 3.5       | 4.2  | 4.3  | 3.1  | 4.1  | 3.8  |
| <i>Max</i>                                | 11.0       | 10.0 | 14.0 | 12.0 | 11.0 | 3.0  | 6.9       | 5.5  | 13.8 | 6.8  | 4.9  | 6.8  |
| <i>SD</i>                                 | 2.64       | 2.30 | 6.50 | 4.72 | 5.85 | 1.52 | 1.71      | 0.70 | 5.00 | 1.85 | 0.40 | 1.56 |
| <b>Control</b>                            |            |      |      |      |      |      |           |      |      |      |      |      |
| <i>Min</i>                                | 3.00       | 6.00 | 3.00 | 2.0  | 4.00 | 1.00 | 2.90      | 2.40 | 4.50 | 2.30 | 3.20 | 3.00 |
| <i>Max</i>                                | 11.0       | 10.0 | 8.00 | 8.0  | 7.00 | 3.00 | 4.80      | 6.10 | 6.30 | 4.00 | 4.10 | 3.20 |
| <i>SD</i>                                 | 4.16       | 2.08 | 2.88 | 3.21 | 1.73 | 1.15 | 1.06      | 2.05 | 1.01 | 0.92 | 0.49 | 0.11 |
| <b>EMLA™</b>                              |            |      |      |      |      |      |           |      |      |      |      |      |
| <i>Min</i>                                | 3.00       | 0.00 | 1.00 | 0.00 | 0.00 | 1.00 | 6.10      | 2.50 | 3.60 | 2.80 | 2.60 | 2.50 |
| <i>Max</i>                                | 4.00       | 8.00 | 5.00 | 7.00 | 6.00 | 3.00 | 8.20      | 2.60 | 6.70 | 5.80 | 3.10 | 3.00 |
| <i>SD</i>                                 | 0.57       | 4.16 | 2.30 | 3.60 | 3.05 | 1.00 | 1.06      | 0.05 | 1.76 | 1.50 | 0.28 | 0.28 |
| <b>Lidocaine - Cyclodextrin 2.5%</b>      |            |      |      |      |      |      |           |      |      |      |      |      |
| <i>Min</i>                                | 12.0       | 3.00 | 0.00 | 3.00 | 3.00 | 0.00 | 3.50      | 2.20 | 2.00 | 1.80 | 2.10 | 3.00 |
| <i>Max</i>                                | 12.1       | 20.0 | 14.0 | 11.0 | 11.0 | 8.00 | 5.00      | 4.10 | 2.60 | 2.60 | 2.50 | 4.20 |
| <i>SD</i>                                 | 0.05       | 8.88 | 7.00 | 4.00 | 4.35 | 4.00 | 0.75      | 0.96 | 0.30 | 0.43 | 0.20 | 0.60 |
| <b>Lidocaine - Chitosan 4%</b>            |            |      |      |      |      |      |           |      |      |      |      |      |
| <i>Min</i>                                | 6.00       | 9.00 | 1.00 | 0.00 | 0.00 | 1.00 | 3.60      | 3.50 | 3.60 | 3.80 | 3.00 | 3.10 |
| <i>Max</i>                                | 17.0       | 17.0 | 5.00 | 2.00 | 5.00 | 4.00 | 4.20      | 3.80 | 4.00 | 4.60 | 5.40 | 5.80 |
| <i>SD</i>                                 | 5.85       | 4.04 | 2.08 | 1.00 | 2.64 | 1.52 | 0.32      | 0.17 | 0.20 | 0.41 | 1.20 | 1.36 |
| <b>Lidocaine - Chitosan - Liposomes</b>   |            |      |      |      |      |      |           |      |      |      |      |      |
| <i>Min</i>                                | 13.0       | 6.00 | 3.00 | 1.00 | 1.00 | 1.00 | 4.90      | 2.60 | 4.30 | 3.20 | 3.70 | 4.00 |
| <i>Max</i>                                | 15.0       | 12.0 | 8.00 | 4.00 | 4.00 | 2.00 | 6.50      | 7.60 | 4.50 | 5.70 | 4.80 | 6.60 |
| <i>SD</i>                                 | 1.00       | 3.05 | 2.64 | 1.52 | 1.52 | 0.57 | 0.80      | 2.51 | 0.11 | 1.28 | 0.55 | 1.37 |
| <b>Lidocaine – Liposomes 1.7%</b>         |            |      |      |      |      |      |           |      |      |      |      |      |
| <i>Min</i>                                | 6.00       | 2.00 | 3.00 | 0.00 | 0.00 | 0.00 | 5.20      | 2.80 | 3.70 | 3.70 | 3.40 | 3.30 |
| <i>Max</i>                                | 13.0       | 10.0 | 4.00 | 6.00 | 2.00 | 1.00 | 6.30      | 4.40 | 4.70 | 6.80 | 6.50 | 6.50 |
| <i>SD</i>                                 | 3.60       | 4.16 | 0.57 | 3.21 | 1.15 | 0.57 | 0.60      | 0.89 | 0.51 | 1.55 | 1.59 | 1.61 |
| <b>Lidocaine</b>                          |            |      |      |      |      |      |           |      |      |      |      |      |
| <i>Min</i>                                | 12.0       | 3.00 | 1.00 | 0.00 | 0.00 | 0.00 | 4.70      | 3.30 | 3.50 | 3.80 | 3.80 | 3.30 |
| <i>Max</i>                                | 20.0       | 16.0 | 3.00 | 2.00 | 2.00 | 1.00 | 5.20      | 3.90 | 5.90 | 6.00 | 5.10 | 4.40 |
| <i>SD</i>                                 | 4.16       | 6.55 | 1.15 | 1.00 | 1.00 | 0.57 | 0.26      | 0.30 | 1.28 | 1.10 | 0.70 | 0.55 |

**Table S7.** Statistical indicators for the researched substances

| <b>Algesimeter</b>                        |          |           |           |            |            |            |
|-------------------------------------------|----------|-----------|-----------|------------|------------|------------|
| <b>Time (min.)</b>                        | <b>0</b> | <b>30</b> | <b>60</b> | <b>120</b> | <b>180</b> | <b>240</b> |
| <b>Lidocaine - Chitosan Hydrochloride</b> |          |           |           |            |            |            |
| <i>Min</i>                                | 4.5      | 6.0       | 7.5       | 9.5        | 6.5        | 10.5       |
| <i>Max</i>                                | 22.5     | 11.0      | 22.0      | 25.0       | 17.0       | 21.5       |
| <i>SD</i>                                 | 9.86     | 2.56      | 7.42      | 8.12       | 5.25       | 5.76       |
| <b>Control</b>                            |          |           |           |            |            |            |
| <i>Min</i>                                | 7.50     | 7.00      | 4.5       | 2.5        | 6.0        | 5.50       |
| <i>Max</i>                                | 16.0     | 16.0      | 21.5      | 6.0        | 10.7       | 11.0       |
| <i>SD</i>                                 | 4.64     | 4.93      | 0.07      | 2.02       | 2.35       | 3.06       |
| <b>EMLA™</b>                              |          |           |           |            |            |            |
| <i>Min</i>                                | 11.5     | 13.0      | 8.50      | 9.0        | 7.50       | 4.50       |
| <i>Max</i>                                | 22.0     | 25.0      | 24.5      | 23.5       | 12.0       | 21.5       |
| <i>SD</i>                                 | 5.34     | 6.92      | 8.41      | 7.26       | 2.29       | 9.07       |
| <b>Lidocaine - Cyclodextrin 2.5%</b>      |          |           |           |            |            |            |
| <i>Min</i>                                | 5.80     | 4.50      | 5.00      | 10.5       | 11.0       | 8.50       |
| <i>Max</i>                                | 21.0     | 11.5      | 7.40      | 15.5       | 12.4       | 14.0       |
| <i>SD</i>                                 | 7.61     | 3.68      | 1.20      | 2.64       | 0.73       | 2.92       |
| <b>Lidocaine - Chitosan 4%</b>            |          |           |           |            |            |            |
| <i>Min</i>                                | 7.50     | 7.50      | 6.00      | 4.50       | 6.50       | 4.50       |
| <i>Max</i>                                | 25.0     | 20.0      | 25.0      | 20.0       | 7.50       | 6.00       |
| <i>SD</i>                                 | 9.69     | 6.38      | 9.84      | 8.54       | 0.50       | 0.76       |
| <b>Lidocaine - Chitosan - Liposomes</b>   |          |           |           |            |            |            |
| <i>Min</i>                                | 4.50     | 4.00      | 2.30      | 7.00       | 5.00       | 5.50       |
| <i>Max</i>                                | 7.50     | 7.50      | 6.00      | 9.50       | 6.50       | 9.50       |
| <i>SD</i>                                 | 1.50     | 1.80      | 2.00      | 1.32       | 0.76       | 2.08       |
| <b>Lidocaine – Liposomes 1.7%</b>         |          |           |           |            |            |            |
| <i>Min</i>                                | 6.00     | 5.00      | 5.50      | 4.00       | 8.50       | 5.50       |
| <i>Max</i>                                | 10.5     | 14.0      | 12.5      | 10.5       | 12.5       | 13.5       |
| <i>SD</i>                                 | 2.36     | 4.93      | 3.54      | 3.32       | 2.17       | 4.16       |
| <b>Lidocaine</b>                          |          |           |           |            |            |            |
| <i>Min</i>                                | 5.00     | 4.00      | 4.00      | 3.50       | 4.00       | 3.50       |
| <i>Max</i>                                | 8.50     | 4.50      | 7.50      | 5.00       | 6.00       | 11.0       |
| <i>SD</i>                                 | 1.80     | 0.28      | 1.89      | 0.76       | 1.04       | 4.07       |
